# Supplementary material for: Ageing, metabolism and the intestine
Source: PubMed Central journal article supplement (PMC7332987; doi:10.15252/embr.202050047), 2020-06-21
Supplement: EMBR-21-e50047-s001.pdf [file EMBR-21-e50047-s001.pdf]

**Table 1:**

| <i>Drosophila</i> gene                  | Mouse homolog            | Homology score | Human homolog            | Homology score |
|-----------------------------------------|--------------------------|----------------|--------------------------|----------------|
| Metabolism                              |                          |                |                          |                |
| <a href="#">Ancy</a>                    | <a href="#">Gm4737</a>   | +++            | <a href="#">AHCY</a>     | +++            |
| <a href="#">AncyL1</a>                  | <a href="#">AncyL1</a>   | +++            | <a href="#">AHCYL1</a>   | +++            |
| <a href="#">AncyL2</a>                  | <a href="#">AncyL2</a>   | +++            | <a href="#">AHCYL2</a>   | +++            |
| <a href="#">Crtc</a>                    | <a href="#">Crtc1</a>    | +++            | <a href="#">CRTC1</a>    | +++            |
| <a href="#">mGluR</a>                   | <a href="#">Grm3</a>     | +++            | <a href="#">GRM3</a>     | +++            |
| <a href="#">CanB</a>                    | <a href="#">Ppp3r1</a>   | +++            | <a href="#">PPP3R1</a>   | +++            |
| <a href="#">Drp1</a>                    | <a href="#">Dmn1l</a>    | +++            | <a href="#">DNM1L</a>    | +++            |
| <a href="#">Gcn2</a>                    | <a href="#">Eif2ak4</a>  | +++            | <a href="#">EIF2AK4</a>  | +++            |
| <a href="#">park</a>                    | <a href="#">Prkn</a>     | +++            | <a href="#">PRKN</a>     | +++            |
| <a href="#">Pgam5</a>                   | <a href="#">Pgam5</a>    | +++            | <a href="#">PGAM5</a>    | +++            |
| <a href="#">Pgant4</a>                  | <a href="#">Galnt10</a>  | +++            | <a href="#">GALNT10</a>  | +++            |
| <a href="#">Pink1</a>                   | <a href="#">Pink1</a>    | +++            | <a href="#">PINK1</a>    | +++            |
| Signaling                               |                          |                |                          |                |
| <a href="#">AMPK<math>\alpha</math></a> | <a href="#">Prkaa2</a>   | +++            | <a href="#">PRKAA2</a>   | +++            |
| <a href="#">Iip3</a>                    | <a href="#">Igf1</a>     | +              | <a href="#">INS</a>      | +              |
| <a href="#">InR</a>                     | <a href="#">Insr</a>     | +++            | <a href="#">INSR</a>     | +++            |
| <a href="#">Pi3K21B</a>                 | <a href="#">Pik3r3</a>   | +++            | <a href="#">PIK3R3</a>   | +++            |
| <a href="#">srl</a>                     | <a href="#">Pprc1</a>    | +++            | <a href="#">PPRC1</a>    | +++            |
| <a href="#">Tor</a>                     | <a href="#">Mtor</a>     | +++            | <a href="#">MTOR</a>     | +++            |
| <a href="#">Thor</a>                    | <a href="#">Eif4ebp1</a> | +++            | <a href="#">EIF4EBP1</a> | +++            |
| <a href="#">DI</a>                      | <a href="#">Dil1</a>     | +++            | <a href="#">DLL1</a>     | +++            |

|                         |                        |     |                        |     |
|-------------------------|------------------------|-----|------------------------|-----|
| <a href="#">N</a>       | <a href="#">Notch1</a> | +++ | <a href="#">NOTCH1</a> | +++ |
| <a href="#">msn</a>     | <a href="#">Tnik</a>   | +++ | <a href="#">TNIK</a>   | +++ |
| <a href="#">wts</a>     | <a href="#">Lats2</a>  | +++ | <a href="#">LATS1</a>  | +++ |
| <a href="#">yki</a>     | <a href="#">Yap1</a>   | +++ | <a href="#">YAP1</a>   | +++ |
| <a href="#">Upd3</a>    | <a href="#">Il-6</a>   | N/A | <a href="#">IL-6</a>   | N/A |
| <a href="#">hop</a>     | <a href="#">Jak2</a>   | +++ | <a href="#">JAK2</a>   | +++ |
| <a href="#">Stat92E</a> | <a href="#">Stat5b</a> | +++ | <a href="#">STAT5B</a> | +++ |
| <a href="#">bsk/JNK</a> | <a href="#">Mapk8</a>  | +++ | <a href="#">MAPK10</a> | +++ |
| <a href="#">Myc</a>     | <a href="#">Myc</a>    | ++  | <a href="#">MYC</a>    | ++  |
| Other functions         |                        |     |                        |     |
| <a href="#">Brf</a>     | <a href="#">Brf1</a>   | +++ | <a href="#">BRF1</a>   | +++ |
| <a href="#">eEF2</a>    | <a href="#">Eef2</a>   | +++ | <a href="#">EEF2</a>   | +++ |
| <a href="#">FoxK</a>    | <a href="#">Foxk1</a>  | +++ | <a href="#">FOXK2</a>  | +++ |
| <a href="#">Ire1</a>    | <a href="#">Ern1</a>   | +++ | <a href="#">ERN1</a>   | +++ |
| <a href="#">Xbp1</a>    | <a href="#">Xbp1</a>   | +++ | <a href="#">XBP1</a>   | +++ |
| <a href="#">Atg1</a>    | <a href="#">Ulk1</a>   | +++ | <a href="#">ULK1</a>   | +++ |
| <a href="#">bbg</a>     | <a href="#">Pdzd2</a>  | ++  | <a href="#">PDZD2</a>  | +   |
| <a href="#">Col4a1</a>  | <a href="#">Col4a1</a> | +++ | <a href="#">COL4A6</a> | +++ |
| <a href="#">crc</a>     | <a href="#">ATF4</a>   | ++  | <a href="#">ATF4</a>   | ++  |
| <a href="#">Piwi</a>    | <a href="#">Piwil1</a> | +++ | <a href="#">PIWIL3</a> | +++ |
| <a href="#">prom</a>    | <a href="#">Prom1</a>  | +++ | <a href="#">PROM2</a>  | +++ |
| <a href="#">Tk</a>      | <a href="#">Tac1</a>   | +   | <a href="#">TAC1</a>   | +   |
| <a href="#">Tg</a>      | <a href="#">Tgm1</a>   | +++ | <a href="#">TGM1</a>   | +++ |
| <a href="#">Wdr62</a>   | <a href="#">Wdr62</a>  | +++ | <a href="#">WDR62</a>  | +++ |

**Table 1:** *Drosophila* genes discussed in the review with their predicted homolog in Mouse and Human (Homology Score based on [flybase.org](http://flybase.org) algorithm). All genes are linked to their respective NCBI gene entry. Homology score: 1 - 2: +, 3 - 5: ++, 6 - 15: +++

**Table 2**

| Mouse gene                    | <i>Drosophila</i> homolog | Homology Score | Human homolog          | Homology Score |
|-------------------------------|---------------------------|----------------|------------------------|----------------|
| Metabolism                    |                           |                |                        |                |
| <a href="#">Mtor</a>          | <a href="#">Tor</a>       | +++            | <a href="#">MTOR</a>   | +++            |
| <a href="#">Stk11 (Lkb1)</a>  | <a href="#">Lkb1</a>      | +++            | <a href="#">STK11</a>  | +++            |
| <a href="#">Mpc1</a>          | <a href="#">Mpc1</a>      | +++            | <a href="#">MPC1</a>   | +++            |
| <a href="#">Pdk4</a>          | <a href="#">Pdk</a>       | +++            | <a href="#">PDK4</a>   | +++            |
| <a href="#">Cpt1a</a>         | <a href="#">whd</a>       | +++            | <a href="#">CPT1A</a>  | +++            |
| <a href="#">Ppard</a>         | <a href="#">Eip75B</a>    | ++             | <a href="#">PPARD</a>  | +++            |
| <a href="#">Ppara</a>         | <a href="#">Eip75B</a>    | ++             | <a href="#">PPARA</a>  | +++            |
| <a href="#">Sirt1</a>         | <a href="#">Sirt1</a>     | +++            | <a href="#">SIRT1</a>  | +++            |
| <a href="#">Hmgcs2</a>        | <a href="#">HMGS</a>      | +++            | <a href="#">HMGCS2</a> | +++            |
| Signalling                    |                           |                |                        |                |
| <a href="#">Wnt3</a>          | <a href="#">wg</a>        | +              | <a href="#">WNT3</a>   | +++            |
| <a href="#">Lgr5</a>          | <a href="#">rk</a>        | +++            | <a href="#">LGR5</a>   | +++            |
| <a href="#">Ctnnb1</a>        | <a href="#">arm</a>       | +++            | <a href="#">CTNNB1</a> | +++            |
| <a href="#">Notum</a>         | <a href="#">Notum</a>     | +++            | <a href="#">NOTUM</a>  | +++            |
| <a href="#">Notch1</a>        | <a href="#">N</a>         | +++            | <a href="#">NOTCH1</a> | +++            |
| <a href="#">Atoh1</a>         | <a href="#">cato</a>      | +++            | <a href="#">ATOH1</a>  | +++            |
| <a href="#">Sox9</a>          | <a href="#">Sox100B</a>   | ++             | <a href="#">SOX9</a>   | +++            |
| <a href="#">Mapk14 (p38)</a>  | <a href="#">p38b</a>      | +++            | <a href="#">MAPK14</a> | +++            |
| <a href="#">Map2k6 (MKK6)</a> | <a href="#">lic</a>       | +++            | <a href="#">MAP2K6</a> | +++            |
| <a href="#">Trp53</a>         | <a href="#">p53</a>       | ++             | <a href="#">TP53</a>   | +++            |

**Table 2:** Mouse genes discussed in the review with their predicted homolog in *Drosophila* and Human (Homology Score based on [flybase.org](http://flybase.org) algorithm). All genes are linked to their respective NCBI gene entry. Homology score: 1 - 2: +, 3 - 5: ++, 6 - 15: +++
